# Supplementary material for: Differential Upregulation of Th1/Th17-Associated Proteins and PD-L1 in Granulomatous Mycosis Fungoides
Source: MDPI journal article supplement (doi:10.3390/cells13050419), 2024-02-27
Supplement: s1 [file s1]

**Table S1.** Antibodies and dilutions of immunohistochemical markers used in the diagnostic assessment of patients with granulomatous mycosis fungoides (GMF) and mycosis fungoides with large cell transformation (MFLCT).

| Immunohistochemical Marker | Conditions     |               |           |
|----------------------------|----------------|---------------|-----------|
|                            | Antibody Clone | Catalogue#    | Dilutions |
| CD1a                       | MTB1           | PA0235        | RTU       |
| CD2                        | AB75           | NCL-L-CD2-271 | 1:75      |
| CD3                        | LN10           | PA0122        | RTU       |
| CD4                        | SP35           | 104R-16       | 1:25      |
| CD5                        | 4C7            | MS-393-S      | 1:20      |
| CD7                        | 4C7            | PA0168        | RTU       |
| CD8                        | LP15           | NCL-L-CD7-580 | 1:100     |
| CD20                       | 4B11           | MS-47-S       | RTU       |
| CD25                       | L26            | PA0200        | RTU       |
| CD30                       | 4C9            | PA0305        | RTU       |
| EBER                       | Ber-H2         | 790-4858      | RTU       |
| TCRBF1                     | 8A3            | TCR1151       | 1:100     |
| TCRG                       | H41            | sc-100289     | 1:150     |

RTU, ready to use.

**Table S2.** Number of events according different variables for the cohort.

|                | Cohort |
|----------------|--------|
| Clinical Stage |        |
| Stage 1        | 5/13   |
| Stage 2        | 11/16  |
| Stage 4        | 12/13  |
| Unknown        | 2/7    |
| Group          |        |
| GMF            | 12/28  |
| MFLCT          | 18/21  |
| %ROR®T         |        |
| <10%           | 17/21  |
| ≥10%           | 13/28  |
| %Foxp3         |        |
| <10%           | 10/12  |
| ≥10%           | 20/37  |

GMF: granulomatous mycosis fungoides; MFLCT: mycosis fungoides with large cell transformation.
